## **Paracoracoid versus Costoclavicular Approach to Infraclavicular Block: A Prospective, Two Arm, Parallel design, Single-centre Randomized Controlled Trial**

Brigid Brown, FCANZA,† Pauline Magsaysay, MD,‡ Yves Bureau, PhD,# Janice Yu, MD,\*  
Shalini Dhir, FRCPC\*\*

### **From the:**

† Department of Anesthesia, Flinders Medical Centre, Adelaide, Australia

‡ Department of Anesthesia Los Santos Medical Center, Quezon City, Philippines

# Department of Medical Biophysics, Western University, London, Canada

\* Department of Anesthesia, McMaster University, Hamilton, Canada

\*\* Department of Anesthesia and Perioperative Medicine, Western University, London, Canada

### **Address correspondence to:**

Shalini Dhir, FRCPC, Department of Anesthesia and Perioperative Medicine, St. Joseph's Health Care, Western University, 268 Grosvenor's Street, London, Ontario, Canada

email: [sdhir2@uwo.ca](mailto:sdhir2@uwo.ca)

Twitter: @DhirShaliniMD

### **Conflicts of Interest:**

The authors declare no conflicts of interest

### **Funding:**

The authors have no sources of funding to declare for this manuscript.

### **Running head:**

Costoclavicular and paracoracoid approaches to brachial plexus

## **ABSTRACT**

**Introduction:** Paracoracoid approach to the brachial plexus block is the conventional infraclavicular technique for upper limb surgeries. In this approach, the ultrasound transducer is placed in the parasagittal plane below the clavicle, medial to the coracoid process. In this view, three cords are separated from each other and are rarely visualized in a single ultrasound window. In the costoclavicular approach, the ultrasound transducer is placed parallel to and below the clavicle. In this view, the cords are clustered together, at a more superficial level. We conducted a randomized controlled trial to compare these two infraclavicular brachial plexus approaches.

**Methods:** Seventy patients were randomized to receive either a paracoracoid or costoclavicular infraclavicular block. Both groups received 35 ml of 0.5% ropivacaine under ultrasound guidance. The primary outcome was sensory block onset time while secondary outcomes included performance times, complications during block insertion (paresthesia, vascular puncture, pleural puncture), block failure, patient satisfaction, and postoperative complications. Telephone follow-up was done 24 h and 7 days later.

**Results:** Sensory block onset time was significantly shorter in the paracoracoid group 18.7 (4.4) min versus 22.2 (6.2) min ( $p=0.045$ ). Block success at 30 minutes was the same between both groups. There was no difference in any secondary outcomes.

**Conclusions:** This randomized controlled trial demonstrated that the novel costoclavicular approach to the infraclavicular brachial plexus block had similar procedure time, block success and similar complication rates for upper limb surgery when compared to the traditional paracoracoid technique. However, it resulted in longer sensory block onset time.

## 1 INTRODUCTION

2 The infraclavicular brachial plexus block is a well-recognized regional anesthesia technique for  
3 surgeries performed on the distal arm.<sup>1</sup> In the last fifteen years, the use of ultrasound guidance has  
4 become popular for this conventional approach.<sup>2</sup> Though multiple approaches have been described,  
5 paracoracoid approach is traditionally used, worldwide.<sup>3,4</sup> In this approach, all three cords of the  
6 brachial plexus are separated from one another (figure 1a and 1b) and may not be seen in a single  
7 ultrasound window.<sup>5-7</sup> There can also be significant variation in the position of the individual cords  
8 relative to the axillary artery.<sup>6</sup>

9 A new approach to the infraclavicular block has been described in which the ultrasound transducer is  
10 placed parallel and inferior to the clavicle and the block needle is inserted in-plane from a lateral to  
11 medial direction into the costoclavicular area, the space between the clavicular head of the pectoralis  
12 major and the subclavius muscle anterior and the posterior surface of the clavicle and the second rib,  
13 posteriorly. In this approach, the cords are clustered together around the lateral edge of the artery at a  
14 more superficial level compared with the paracoracoid view (figure 2a and 2b).<sup>8</sup> Several researchers  
15 have suggested that the cords and needle may be easier to visualize with less needle manipulation  
16 during the procedure, potentially resulting in a faster onset of the block and a lower incidence of  
17 complications.<sup>9-12</sup>

18 The primary aim of this study was to compare the block onset time of the novel costoclavicular (CC)  
19 with the conventional paracoracoid (PC) approach to the infraclavicular brachial plexus. We  
20 undertook a randomized controlled trial to compare the block onset time with both techniques and to  
21 test the hypothesis that the CC approach was similar to the well-established traditional approach.  
22 Secondary endpoints included procedure time, procedure related pain and complications, surgical  
23 block success, block supplementation and patient satisfaction.

## 24 **METHODS**

25 After obtaining institutional ethics approval (#106875, Western University, London, Ontario), the  
26 study was registered with clinicaltrials.gov (NCT02657291) on 10 December 2015. After written  
27 informed consent, we prospectively enrolled 70 adult ASA I-III patients aged 18-80 years scheduled  
28 for elective ambulatory upper limb surgery of the elbow, forearm, wrist, or hand under regional  
29 anesthesia. Exclusion criteria included coagulopathy, local anesthetic drug allergy, local site infection  
30 or scarring, BMI greater than 35 kg.m<sup>-2</sup>, failure to understand pain scores, pregnant or breastfeeding,  
31 and chronic narcotic use. The study was conducted at the Hand and Upper Limb Centre, St. Joseph's  
32 Hospital in London, Ontario between December 2015 and April 2017. Applicable Equator guidelines  
33 were followed and the CONSORT 2010 and its extension for reporting multi-arm trial parallel group  
34 trial were met.

35 Using a computer-generated randomization, patients were randomly assigned to one of two groups,  
36 each with 35 subjects, to receive an infraclavicular block with either a paracoracoid or costoclavicular  
37 approach. Group allocations were concealed in opaque envelopes until opened by the anesthesiologist  
38 performing the block. This person had no further involvement in the data collection. All blocks were  
39 initiated in a dedicated block room space under aseptic conditions, following intravenous access and  
40 the application of standard monitoring and performed by anesthesiologists well versed with both  
41 techniques (SD, BB, PM). All blocks were ultrasound guided. Lidocaine 1% (3-5 ml) was used for  
42 subcutaneous infiltration prior to initiation of the block, with further supplements as necessary. A  
43 Sonosite M-Turbo ultrasound (SonoSite Inc., Bothell, WA, USA) with a high-frequency 10-6 MHz  
44 linear array transducer probe with a sterile cover and an 80 mm needle (Pajunk® Geisingen,  
45 Germany) were used for all blocks. All patients received a total of 35 ml of 0.5% ropivacaine  
46 delivered in aliquots. Patients in both groups also received an intercostobrachial nerve block with 5 ml  
47 of 1.5% lidocaine for tourniquet pain.<sup>13</sup> Complications during block performance such as vascular  
48 puncture and paresthesia with needle placement were documented. Once the block was completed,  
49 both the possible injection sites were concealed with a dressing to ensure observer blinding.

### 50 **Block performance:**

51 **The paracoracoid approach:** An ultrasound guided parasagittal paracoracoid (deltopectoral) was

52 used. The needle was inserted in an in-plane approach, at the six o' clock location, just inferior to the  
53 axillary artery.<sup>14</sup> Aiming at the posterior cord location, two thirds of the drug was deposited at the six  
54 o'clock position while the remaining one third was deposited at the nine o'clock position aiming at  
55 the lateral cord, during needle retraction.

56 **The costoclavicular approach:** An ultrasound guided approach as described by Karmakar et al was  
57 used.<sup>15</sup> The ultrasound transducer was placed parallel and inferior to the clavicle and angled cephalad  
58 to optimize the ultrasound view. The block needle was inserted in-plane from a lateral to medial  
59 direction into the costoclavicular space and the entire drug was deposited in this location.

60 After the block and dressing placement, a blinded observer (JY) unaware of block assignments and  
61 not present during block placement performed all assessments of block onset. Motor and sensory  
62 block onset of median, radial, ulnar, musculocutaneous, and axillary nerves was evaluated every 5  
63 minutes until the block was complete, or until 30 minutes had elapsed. Sensory block was tested with  
64 ice in the appropriate dermatomes of the brachial plexus (2 = normal sensations; 1 = loss of some cold  
65 sensations; and 0 = total loss of cold sensations). An effective sensory block was a score of 0 in all  
66 nerve distributions. Concurrently, motor block was evaluated (median: thumb opposition; ulnar:  
67 finger abduction; radial: wrist/elbow extension; musculocutaneous: elbow flexion) using a similar  
68 scale (2 = normal movements possible, 1 = reduced movements but not able to perform movements  
69 against resistance, and 0 = total loss of motor power). For incompletely blocked patients at the end of  
70 30 minutes, the surgery proceeded either with supplemental blocks and/or deep sedation or general  
71 anesthesia. A single unblocked nerve territory was supplemented distally, at the axilla or the elbow. If  
72 there were more than one unblocked nerve, a plexus block was repeated at a different site. If there was  
73 insufficient time for local anesthetic supplementation, patients received a general anesthetic.

#### 74 **Outcomes measurements**

75 The primary outcome for this study was the time to sensory block onset. Secondary outcomes  
76 included procedure time, block failure leading to technique supplementation or conversion to general  
77 anesthetic (GA), complications during block insertion (vascular puncture, pleural puncture, and  
78 paresthesia), other postoperative complications and patient satisfaction. Patients whose block data  
79 could not be collected were excluded from the analysis. Patients who required deep sedation because

80 they did not want to be awake/aware during the surgery were not considered block failures and were  
81 included.

82 All patients were telephoned on postoperative day 1 and 7 by the blinded observer who asked  
83 standardized questions regarding postoperative complications including nausea, vomiting, opioid use,  
84 weakness, persistent paresthesia, pain (standardized scale from 0 = no pain to 10 = worst pain  
85 imaginable) and overall block/anesthesia related satisfaction (standardized scale from 0 = completely  
86 dissatisfied to 10 = completely satisfied). All adverse events were followed up until resolved.

### 87 **Statistical Analysis**

88 The sample size estimation for this study was based on mean onset time of the sensory block. We  
89 used comparison of two means to calculate the sample size with a type 1 error of 5% (two-sided alpha  
90 of 0.05) and power (1-beta) of 85%.<sup>16</sup> We determined a priori that the difference of 5 minute was the  
91 smallest effect that was acceptable such that a difference of less than 5 minute would be clinically  
92 insignificant. Assuming an onset time standard deviation (SD) of 7.1 minutes taken from a previously  
93 published study,<sup>17</sup> we calculated that 58 patients were required to achieve a power of 85% to declare  
94 that the lower limit of a one-sided 95% confidence interval (or equivalently a 90% two-sided  
95 confidence interval) would be above the limit of -5.<sup>18</sup> To accommodate for loss of retention, the  
96 enrollment was increased to a total of 70 patients for this study. From the same study, we calculated  
97 the procedure time SD (appendix 1), and found that this sample size was also sufficient to be 80%  
98 sure that the lower limit of a one-sided 95% confidence interval (or equivalent 90% two-sided  
99 confidence interval) was above the limit of -12 sec. We did a post-hoc power calculation based on the  
100 mean (SD) onset time of 20.8 (6.4) min for all study patients and found that the study was powered to  
101 detect a 5 min difference in mean onset time at  $p = 0.05$  and 90% power.

102 We used IBM SPSS (Ver. 23 SPSS Inc, Chicago IL, 2015 for the statistical analysis. Analysis of all  
103 continuous variables (time to perform the block, sensory/motor block onset) was done by using  
104 student's t-test. For dichotomous variables, Pearson's chi squared test was used. All analyses were  
105 considered significant when the resulting type 1 error was less than 0.05 ( $p < 0.05$ ).

106 **RESULTS**

107 For this study, 74 patients were assessed for eligibility, of which 70 were randomized, with 35  
108 assigned to each group (figure 3 - consort diagram). The final analysis included 30 in PC group and  
109 34 in CC group. One patient in the CC group had local anesthetic systemic toxicity (LAST) and was  
110 resuscitated with intralipid. This patient was excluded from analysis. There were 5 patients in the PC  
111 group whose assessment could not be completed. The two groups were comparable in terms of patient  
112 characteristics and surgical procedures performed (table 1).

113 Table 1. Subject characteristics according to inclusion in primary analysis.

|                             | <b>Paracoracoid (PC)</b> | <b>Costoclavicular (CC)</b> |
|-----------------------------|--------------------------|-----------------------------|
|                             | <b>(n=30)</b>            | <b>(n=34)</b>               |
| <b>Height cm</b>            | 171.0 (10.9)             | 168.7 (9.5)                 |
| <b>Age years</b>            | 47.4 (19.2)              | 49.4 (15.7)                 |
| <b>ASA</b>                  |                          |                             |
| <b>1</b>                    | 10                       | 12                          |
| <b>2</b>                    | 15                       | 18                          |
| <b>3</b>                    | 5                        | 4                           |
| <b>Male: Female</b>         | 19:11                    | 15:19                       |
| <b>Weight kg</b>            | 80.2 (14.2)              | 74.5 (13.5)                 |
| <b>BMI kgm<sup>-2</sup></b> | 27.6 (5.5)               | 26.2 (4.6)                  |
| <b>Surgery types</b>        |                          |                             |
| <b>Elbow</b>                | 6                        | 7                           |
| <b>Wrist</b>                | 13                       | 14                          |
| <b>Hand</b>                 | 11                       | 13                          |

*Data are presented as mean (SD) or number*  
*Abbreviations: ASA: American Society of Anesthesiologists classification, BMI: body mass index*

114

115 The initial imaging time between the groups showed no difference (PC 26.7 versus CC 27.1 sec,  
116 p=0.9). The needling time was significantly different between the groups (PC 162.2 versus CC 188.5  
117 sec, p=0.038). The difference in the total procedure time (PC 188.9 (54.2) vs CC 215.6 (56.2) sec,  
118 p=0.06) was not significant (figure 4). There were no intergroup differences in block failure,  
119 complications during block performance or postoperatively (table 2). The need for conversion to GA

120 (PC 1 vs CC 2, p=0.63), local anesthetic supplementation (PC 0 vs CC 2, p=0.18) or rescue block (PC  
 121 1 vs CC 2, p=0.63) were similar between the groups (table 2).

122 Table 2. Block Characteristics - Values are reported as number of subjects (n).

|                                        | Paracoracoid (PC)<br>N=30 | Costoclavicular (CC)<br>N=34 | p-value |
|----------------------------------------|---------------------------|------------------------------|---------|
| <b>Block Interventions</b>             |                           |                              |         |
| Repeat block                           | 1                         | 2                            | 0.63    |
| Surgical supplementation               | 0                         | 2                            | 0.18    |
| GA                                     | 1                         | 2                            | 0.63    |
| <b>Procedure related complications</b> |                           |                              |         |
| Paresthesia                            | 3                         | 0                            | 0.06    |
| Vascular Puncture                      | 1                         | 0                            | 0.28    |
| <b>Postoperative outcomes</b>          |                           |                              |         |
| Nausea/Vomiting                        | 2                         | 2                            | 0.95    |
| Numbness/Tingling                      | 5                         | 6                            | 0.92    |
| Weakness                               | 0                         | 2                            | 0.16    |
| Satisfaction                           | 30                        | 34                           | 0.96    |

123

124 The primary outcome measure of this study was the sensory block onset. There was a statistically  
 125 significant faster onset in the paracoracoid approach 18.7 (4.4) min compared with the costoclavicular  
 126 approach 22.2 (6.2) min (p=0.045) (figure 5). Sensory and motor block onset for each nerve in the  
 127 plexus are in table 3.

128 At the end of 30 minutes, complete sensory block co-relating with surgical readiness was 93.3% in PC  
 129 group and 91.2% in CC group (p=0.75) (figure 6). The block onset pattern differed between the  
 130 groups over the 30 minutes. The CC group had a faster initial onset with 5 patients (15%)  
 131 demonstrating a sensory block after 5 minutes compared with only 1 patient (3%) in the PC group.  
 132 However, this order changed and at 20 minutes, PC group had a higher number of complete sensory  
 133 block (24 vs 19, p=0.04). Beyond 20 minutes, the sensory block onset was comparable between the  
 134 two groups. There was no difference in motor block onset (appendix 2).



135 Table 3. Block onset data

|                                | <b>Paracoracoid<br/>(PC)<br/>N=30</b> | <b>Costoclavicular<br/>(CC)<br/>N=34</b> | <b>Mean<br/>difference</b> | <b>95% CI of<br/>mean<br/>difference</b> | <b>P value</b> |
|--------------------------------|---------------------------------------|------------------------------------------|----------------------------|------------------------------------------|----------------|
| <b>Total sensory<br/>(min)</b> | 18.7 (4.4)                            | 22.2 (6.2)                               | -1.69                      | -6.99, -0.82                             | <b>0.045*</b>  |
| <b>Axillary<br/>(min)</b>      | 15.3 (6.7)                            | 15.8 (7.5)                               | 0.50                       | -4.01, 5.01                              | 0.82           |
| <b>Median<br/>(min)</b>        | 12.7(5.9)                             | 13.3 (5.9)                               | 1.14                       | -2.5, 4.79                               | 0.54           |
| <b>MCT<br/>(min)</b>           | 11.7 (3.6)                            | 12.8 (5.5)                               | 0.29                       | -2.9, 3.47                               | 0.86           |
| <b>Radial<br/>(min)</b>        | 12.7 (3.2)                            | 13.1 (7.3)                               | 0.58                       | -2.9, 4.09                               | 0.74           |
| <b>Ulnar<br/>(min)</b>         | 12.7 (5.6)                            | 17.2 (7.5)                               | -1.67                      | -5.68, 2.34                              | 0.41           |
| <b>Total motor<br/>(min)</b>   | 20.3 (6.4)                            | 21.7 (6.7)                               | -1.41                      | -5.81, 3.00                              | 0.53           |
| <b>Axillary<br/>(min)</b>      | 18.3 (6.7)                            | 18.1 (7.5)                               | 0.98                       | -3.27, 5.34                              | 0.64           |
| <b>Median<br/>(min)</b>        | 16.3 (6.4)                            | 17.2 (7.1)                               | -1.55                      | -5.49, 2.40                              | 0.44           |
| <b>MCT<br/>(min)</b>           | 16.7 (6.2)                            | 14.7 (8.5)                               | 0.95                       | -3.82, 4.01                              | 0.96           |
| <b>Radial<br/>(min)</b>        | 18.7 (7.2)                            | 15.3 (6.5)                               | 3.19                       | -0.47, 6.85                              | 0.86           |
| <b>Ulnar<br/>(min)</b>         | 15.0 (6.5)                            | 15.0 (5.4)                               | 1.78                       | -1.89, 5.46                              | 0.34           |

*Data are presented as mean (SD)*

*\*shows significant difference*

*Abbreviations: MCT: musculocutaneous, CI: confidence interval, Min: minutes*

136

137

138

139 **DISCUSSION**

140 This observer-blinded, parallel group, two arm randomized controlled study demonstrates that the  
141 paracoracoid approach to the infraclavicular brachial plexus block was associated with significantly  
142 shorter block onset time when compared to the costoclavicular approach. However, there was no  
143 difference in the surgical readiness at the 30 min time point (PC 93.3% versus CC 91.2%,  $p=0.75$ ,  
144 figure 5). Both techniques had similar ultrasound scanning time. Though the costoclavicular approach  
145 took longer needling time and therefore longer overall performance time, the difference missed  
146 statistical significance (188.9 versus 215.6 sec,  $p=0.06$ , figure 3). Shorter procedure and block onset  
147 times are important particularly when the block is used as the primary anesthetic technique. However,  
148 this study found no significant difference between the groups.

149 An interesting finding from this investigation was the pattern of the sensory block onset. In the first 5  
150 minutes after the block performance, the CC group showed sensory block onset in 15% patients  
151 whereas only 3% were blocked in the PC group. At 20 min, the difference in the number of blocked  
152 patients was significantly different but this difference evened out (figure 5). This pattern was not  
153 observed in the motor block onset (figure 6). It is difficult to speculate the reason for this. Previous  
154 authors have noted and explained this difference as a result of using large volumes of local anesthetic  
155 affecting the pattern of block onset.<sup>19</sup> While it is possible that the volume theory may account for  
156 some component of the block onset, it does not seem to fully explain this phenomenon as the volume  
157 used was similar in both groups, consistent with prior studies and do not fully explain the sensory  
158 block onset behaviour.<sup>20,21</sup> The significance of this sensory block pattern may not be clinically  
159 relevant but warrants further studies.

160 One patient in the CC group developed LAST and required intralipid for resuscitation. Though rare,  
161 the quoted incidence of LAST is 0.27%<sup>22</sup> and its possibility cannot be excluded, despite very careful  
162 technique.

163 We need to remark on several limitations of this study. First, it was designed as a non-inferiority  
164 study. With an equivalence trial on the subject showing no intergroup differences,<sup>19</sup> we chose a non-  
165 inferiority design. It is known that equivalence dismisses the option that the new treatment could be  
166 superior. In a non-inferiority design, the difficulty is in choosing the value of delta. The non-  
167 inferiority margin or delta of 5 min was based purely on clinical grounds as we had to choose a cut-

168 off point. Second, we chose to exclude protocol violators and did not analyze them as intention-to-  
169 treat (ITT). ITT is the recommended method in superiority trials.<sup>23</sup> It is known that ITT may not have  
170 a conservative approach and dropouts may direct the results of the study arms towards each other  
171 though per protocol analysis may lead to bias.<sup>24</sup> On the other hand, both types of analyses support  
172 non-inferiority. Third, the sample size chosen was conservative. Though it matched prior studies and  
173 was appropriately calculated, modest sample sizes may not lead to conclusive results. Regardless of  
174 the sample size, it may not be possible to ever prove that the two techniques are truly identical in their  
175 efficacy unless the confidence interval centers on zero or with zero width.<sup>23</sup> Fourth, we did not target  
176 the cords individually but elected to follow the original recommendations of block performance.<sup>15</sup> It is  
177 possible that targeting the cords may have resulted in a faster onset. Fifth, we chose a volume of 35  
178 ml for both techniques. This volume has been established as the minimum effective volume (MEV)  
179 for the conventional paracoracoid approach.<sup>20</sup> Though the appropriate volume for the costoclavicular  
180 approach has not been established, a similar MEV has been suggested.<sup>21</sup> Last, we chose a scoring  
181 system of 2-0 for sensory and motor block onset. Many researchers are now using a composite score  
182 combining all the nerves and achievement of 70-80% of the score is considered success (Karmakar,  
183 M. personal communication with BB, May 2018). We may have been too rigid in choosing a score of  
184 0 (denoting a complete block) in all 5 nerve dermatomes as success.

185 There has been much interest in a more medial approach to the brachial plexus in the infraclavicular  
186 area. Though the costoclavicular approach has been a recent nomenclature, proximal, medial, vertical  
187 approaches essentially describe the same location and there have been multiple studies evaluating the  
188 block characteristics of these approaches.<sup>9, 11, 15, 25</sup> Results from past studies comparing the two  
189 techniques have been equivocal. Some technical reports have led us to believe that medial approaches  
190 may be better and quicker for infraclavicular block.<sup>8, 9, 19, 26</sup> Multiple studies evaluating the feasibility  
191 of the costoclavicular approach to the infraclavicular block have been undertaken but there are very  
192 few studies directly comparing the two approaches albeit with different results. Leurcharusmee et al  
193 compared the costoclavicular approach to the conventional paracoracoid approach and found no  
194 difference.<sup>19</sup> The study by Mosaffa and colleagues compared the nerve stimulation guided  
195 conventional coracoid approach to the more medial vertical infraclavicular approach and found the

196 former to be superior.<sup>27</sup> Songthamwat et al found faster block onset and readiness for surgery with the  
197 costoclavicular approach.<sup>28</sup> In the present study, we found faster sensory block onset with the  
198 conventional paracoracoid approach. The procedure time was not different statistically though there  
199 was a mean difference of a few seconds between the two techniques. Both techniques were found to  
200 be effective for ambulatory upper limb surgery.

201 Notwithstanding the results of this study, there may be indications for using the proximal technique  
202 for catheter insertion and in obese patients as the space is narrower and shallower in this approach. It  
203 is known that the space narrows further with arm abduction and this may be useful in obese patients  
204 whose plexus is located deeper in the more distal paracoracoid area.<sup>29</sup> This may justify the need for  
205 further studies to evaluate the feasibility of the costoclavicular approach in special subgroup of  
206 patients as well as indwelling regional catheter techniques.

## 207 **Conclusion**

208 When compared with the traditional paracoracoid technique, the novel costoclavicular approach to the  
209 infraclavicular brachial plexus block resulted in longer sensory block onset time but demonstrated  
210 similar procedure time, block success and complication rates for ambulatory upper limb surgery.

211 **ACKNOWLEDGEMENTS**

212 This work was presented at

213 1. 36th Annual European Society of Regional Anaesthesia & Pain Therapy (ESRA) Congress 2017:

214 ESRA7-0309.

215 2. Australian and New Zealand College of Anaesthetists Annual Scientific Meeting 2018: accepted

216 for Gilbert Brown prize: abstract #2515.

217 **References**

- 218 1. Chin KJ, Alakkad H, Adhikary SD, Singh M. Infraclavicular brachial plexus block for regional  
219 anaesthesia of the lower arm. *Cochrane Database Syst Rev.* 2013; 8: CD005487.
- 220 2. Porter JM, McCartney CJL, Chan VWS. Needle placement and injection posterior to the axillary artery  
221 may predict successful infraclavicular brachial plexus block: A report of three cases. *Can J Anaesth.*  
222 2005;52:69-73.
- 223 3. MacFarlane A, Anderson K. Infraclavicular brachial plexus blocks. Continuing Education in Anaesthesia  
224 *Crit Care Pain.* 2009; 9:139-243.
- 225 4. Tran DH, Russo G, Munoz L, Zaouter C, Finlayson RJ. A prospective, randomized comparison between  
226 ultrasound-guided supraclavicular, infraclavicular, and axillary brachial plexus blocks. *Reg Anesth Pain*  
227 *Med.* 2009;34:366-371.
- 228 5. Di Filippo A, Orando S, Luna A et al. Ultrasound identification of nerve cords in the infraclavicular fossa:  
229 A clinical study. *Minerva Anesthesiol.* 2012;78:450-455.
- 230 6. Sauter AR, Smith H-J, Stubhaug A, Dodgson MS, Klaastad O. Use of magnetic resonance imaging to  
231 define the anatomical location closest to all three cords of the infraclavicular brachial plexus. *Anesth*  
232 *Analg.* 2006;103:1574-1576.
- 233 7. Lapegue F, Faruch-Bilfeld M, Demondion X et al. Ultrasonography of the brachial plexus, normal  
234 appearance and practical applications. *Diagn Interv Imaging.* 2014;95:259-275.
- 235 8. Sala-Blanch X, Reina MA, Pangthipampai P, Karmakar MK. Anatomic basis for brachial plexus block at  
236 the costoclavicular space a cadaver anatomic study. *Reg Anesth Pain Med.* 2016;41:387-391.
- 237 9. Li JW, Songthamwat B, Samy W, Sala-Blanch X, Karmakar MK. Ultrasound-guided costoclavicular  
238 brachial plexus block sonoanatomy, technique, and block dynamics. *Reg Anesth Pain Med.* 2017;42:233-  
239 240.
- 240 10. Garcia-Vitoria C, Vizuete J, Lopez Navarro AM, Bosch M. Costoclavicular space a reliable gate for  
241 continuous regional anesthesia catheter insertion. *Anesthesiology.* 2017;127:712-712.
- 242 11. Silva GR, Borges DG, Lopes IF, Ruzi RA, Rabello de Macedo Costa PR, Limos da Silva Mandim B.  
243 Ultrasound-guided costoclavicular block as an alternative for upper limb anesthesia in obese patients. *Rev*  
244 *Bras Anesthesiol.* 2019;69:510-513.
- 245 12. Beh ZY, Hasan MS. Ultrasound-guided costoclavicular approach infraclavicular brachial plexus block for  
246 vascular access surgery. *J Vasc Access.* 2017;18:e57-61.

- 247 13. Cutaneous blocks for the upper extremity – landmarks and nerve stimulator technique. Available at:  
248 <https://www.nysora.com/techniques/upper-extremity/distal-nerves/cutaneous-blocks-upper-extremity/>.  
249 Accessed 9 February, 2020.
- 250 14. Dhir S, Brown B, Mack P, Bureau Y, Yu J, Ross D. Infraclavicular and supraclavicular approaches to  
251 brachial plexus for ambulatory elbow surgery: A randomized controlled observer-blinded trial. *J Clin*  
252 *Anesth.* 2018;48:67-72.
- 253 15. Karmakar MK, Sala-Blanch X, Songthamwat B, Tsui BCH. Benefits of the costoclavicular space for  
254 ultrasound-guided infraclavicular brachial plexus block description of a costoclavicular approach. *Reg*  
255 *Anesth Pain Med.* 2015;40:287-288.
- 256 16. Donner A. Approaches to sample-size estimation in the design of clinical trials - a review. *Stat Med.*  
257 1984;3:199-214.
- 258 17. Fredrickson MJ, Patel A, Young S, Chinchawala S. Speed of onset of 'corner pocket supraclavicular' and  
259 infraclavicular ultrasound guided brachial plexus block: A randomised observer-blinded comparison.  
260 *Anaesthesia.* 2009;64:738-744.
- 261 18. Dhand N, Khatkar M. Statulator: An online statistical calculator. Sample size calculator for comparing two  
262 independent means. Available at: <http://statulator.com/SampleSize/ss2M.html>. Accessed 24 January, 2016.
- 263 19. Leurcharusmee P, Elgueta MF, Tiyaprasertkul W et al. A randomized comparison between costoclavicular  
264 and paracoracoid ultrasound-guided infraclavicular block for upper limb surgery. *Can J Anesth.*  
265 2017;64:617-625.
- 266 20. Tran DQH, Dugani S, Dyachenko A, Correa JA, Finlayson RJ. Minimum effective volume of lidocaine for  
267 ultrasound-guided infraclavicular block. *Reg Anesth Pain Med.* 2011;36:190-194.
- 268 21. Sotthisopha T, Elgueta MF, Samerchua A et al. Minimum effective volume of lidocaine for ultrasound-  
269 guided costoclavicular block. *Reg Anesth Pain Med.* 2017;42:571-574.
- 270 22. El-Boghdadly K, Pawa A, Chin KJ. Local anesthetic systemic toxicity: Current perspectives. *Local Reg*  
271 *Anesth.* 2018;11:35-44.
- 272 23. Shah PB. Intention-to-treat and per-protocol analysis. *CMAJ.* 2011;183:696-696.
- 273 24. Lesaffre E. Superiority, equivalence, and non-inferiority trials. *Bull NYU Hosp Jt Dis.* 2008;66:150-4.
- 274 25. Yoshida T, Watanabe Y, Furutani K. Proximal approach for ultrasound-guided infraclavicular brachial  
275 plexus block. *Acta Anaesthesiol Taiwan.* 2016;54:31-2.

- 276 26. Bigeleisen P, Wilson M. A comparison of two techniques for ultrasound guided infraclavicular block. *Br J*  
277 *Anaesth.* 2006;96:502-507.
- 278 27. Mosaffa F, Gharaei B, Rafeeyan M, Gachkar L. Comparing vertical and coracoid approaches for  
279 infraclavicular block in orthopedic surgery of the forearm and hand. *J Clin Anesth.* 2012;24:196-200.
- 280 28. Songthamwat B, Karmakar MK, Li JW, Samy W, Mok LYH. Ultrasound-guided infraclavicular brachial  
281 plexus block prospective randomized comparison of the lateral sagittal and costoclavicular approach. *Reg*  
282 *Anesth Pain Med.* 2018;43:825-831.
- 283 29. Hooper TL, Denton J, McGalliard MK, Brismee J-M, Sizer PS, Jr. Thoracic outlet syndrome: A  
284 controversial clinical condition. Part 1: Anatomy, and clinical examination/diagnosis. *J Man Manip Ther.*  
285 2010;18:74-83.
- 286



287 **Figure Legends**

288 **Figure 1a**

289 Ultrasound scan as seen by the Paracoracoid approach

290 **Figure 1b**

291 Schematic representation showing the relationship of the cords to the axillary artery and the path

292 taken by the block needle during the Paracoracoid infraclavicular approach to the Brachial Plexus.

293 Abbreviation: AA: axillary artery, AV: axillary vein, LC: lateral cord, MC: medial cord, PC: posterior

294 cord, PMj: Pectoralis major, PMn: Pectoralis minor

295 **Figure 2a**

296 Ultrasound scan as seen by the Costoclavicular approach

297 **Figure 2b**

298 Schematic representation showing the relationship of the cords to the axillary artery and the path

299 taken by the block needle during the Costoclavicular infraclavicular approach to the Brachial Plexus.

300 Abbreviation: AA: axillary artery, LC: lateral cord, MC: medial cord, PC: posterior cord, PMj:

301 Pectoralis major

302 **Figure 3**

303 Consort diagram of patient recruitment

304 Abbreviation: LAST: Local Anesthetic Systemic Toxicity, CC: costoclavicular group, PC:

305 paracoracoid group

306 **Figure 4**

307 Procedure times. The boxes represent mean time in seconds and the whiskers show SEM

308 **Figure 5**

309 Primary outcome: sensory block onset. The boxes represent mean time in minutes and the whiskers

310 show SEM. The difference was significant ( $p=0.045$ )

311 **Figure 6**

312 Percentage ready for surgery at various time points during the 30 minutes assessment period

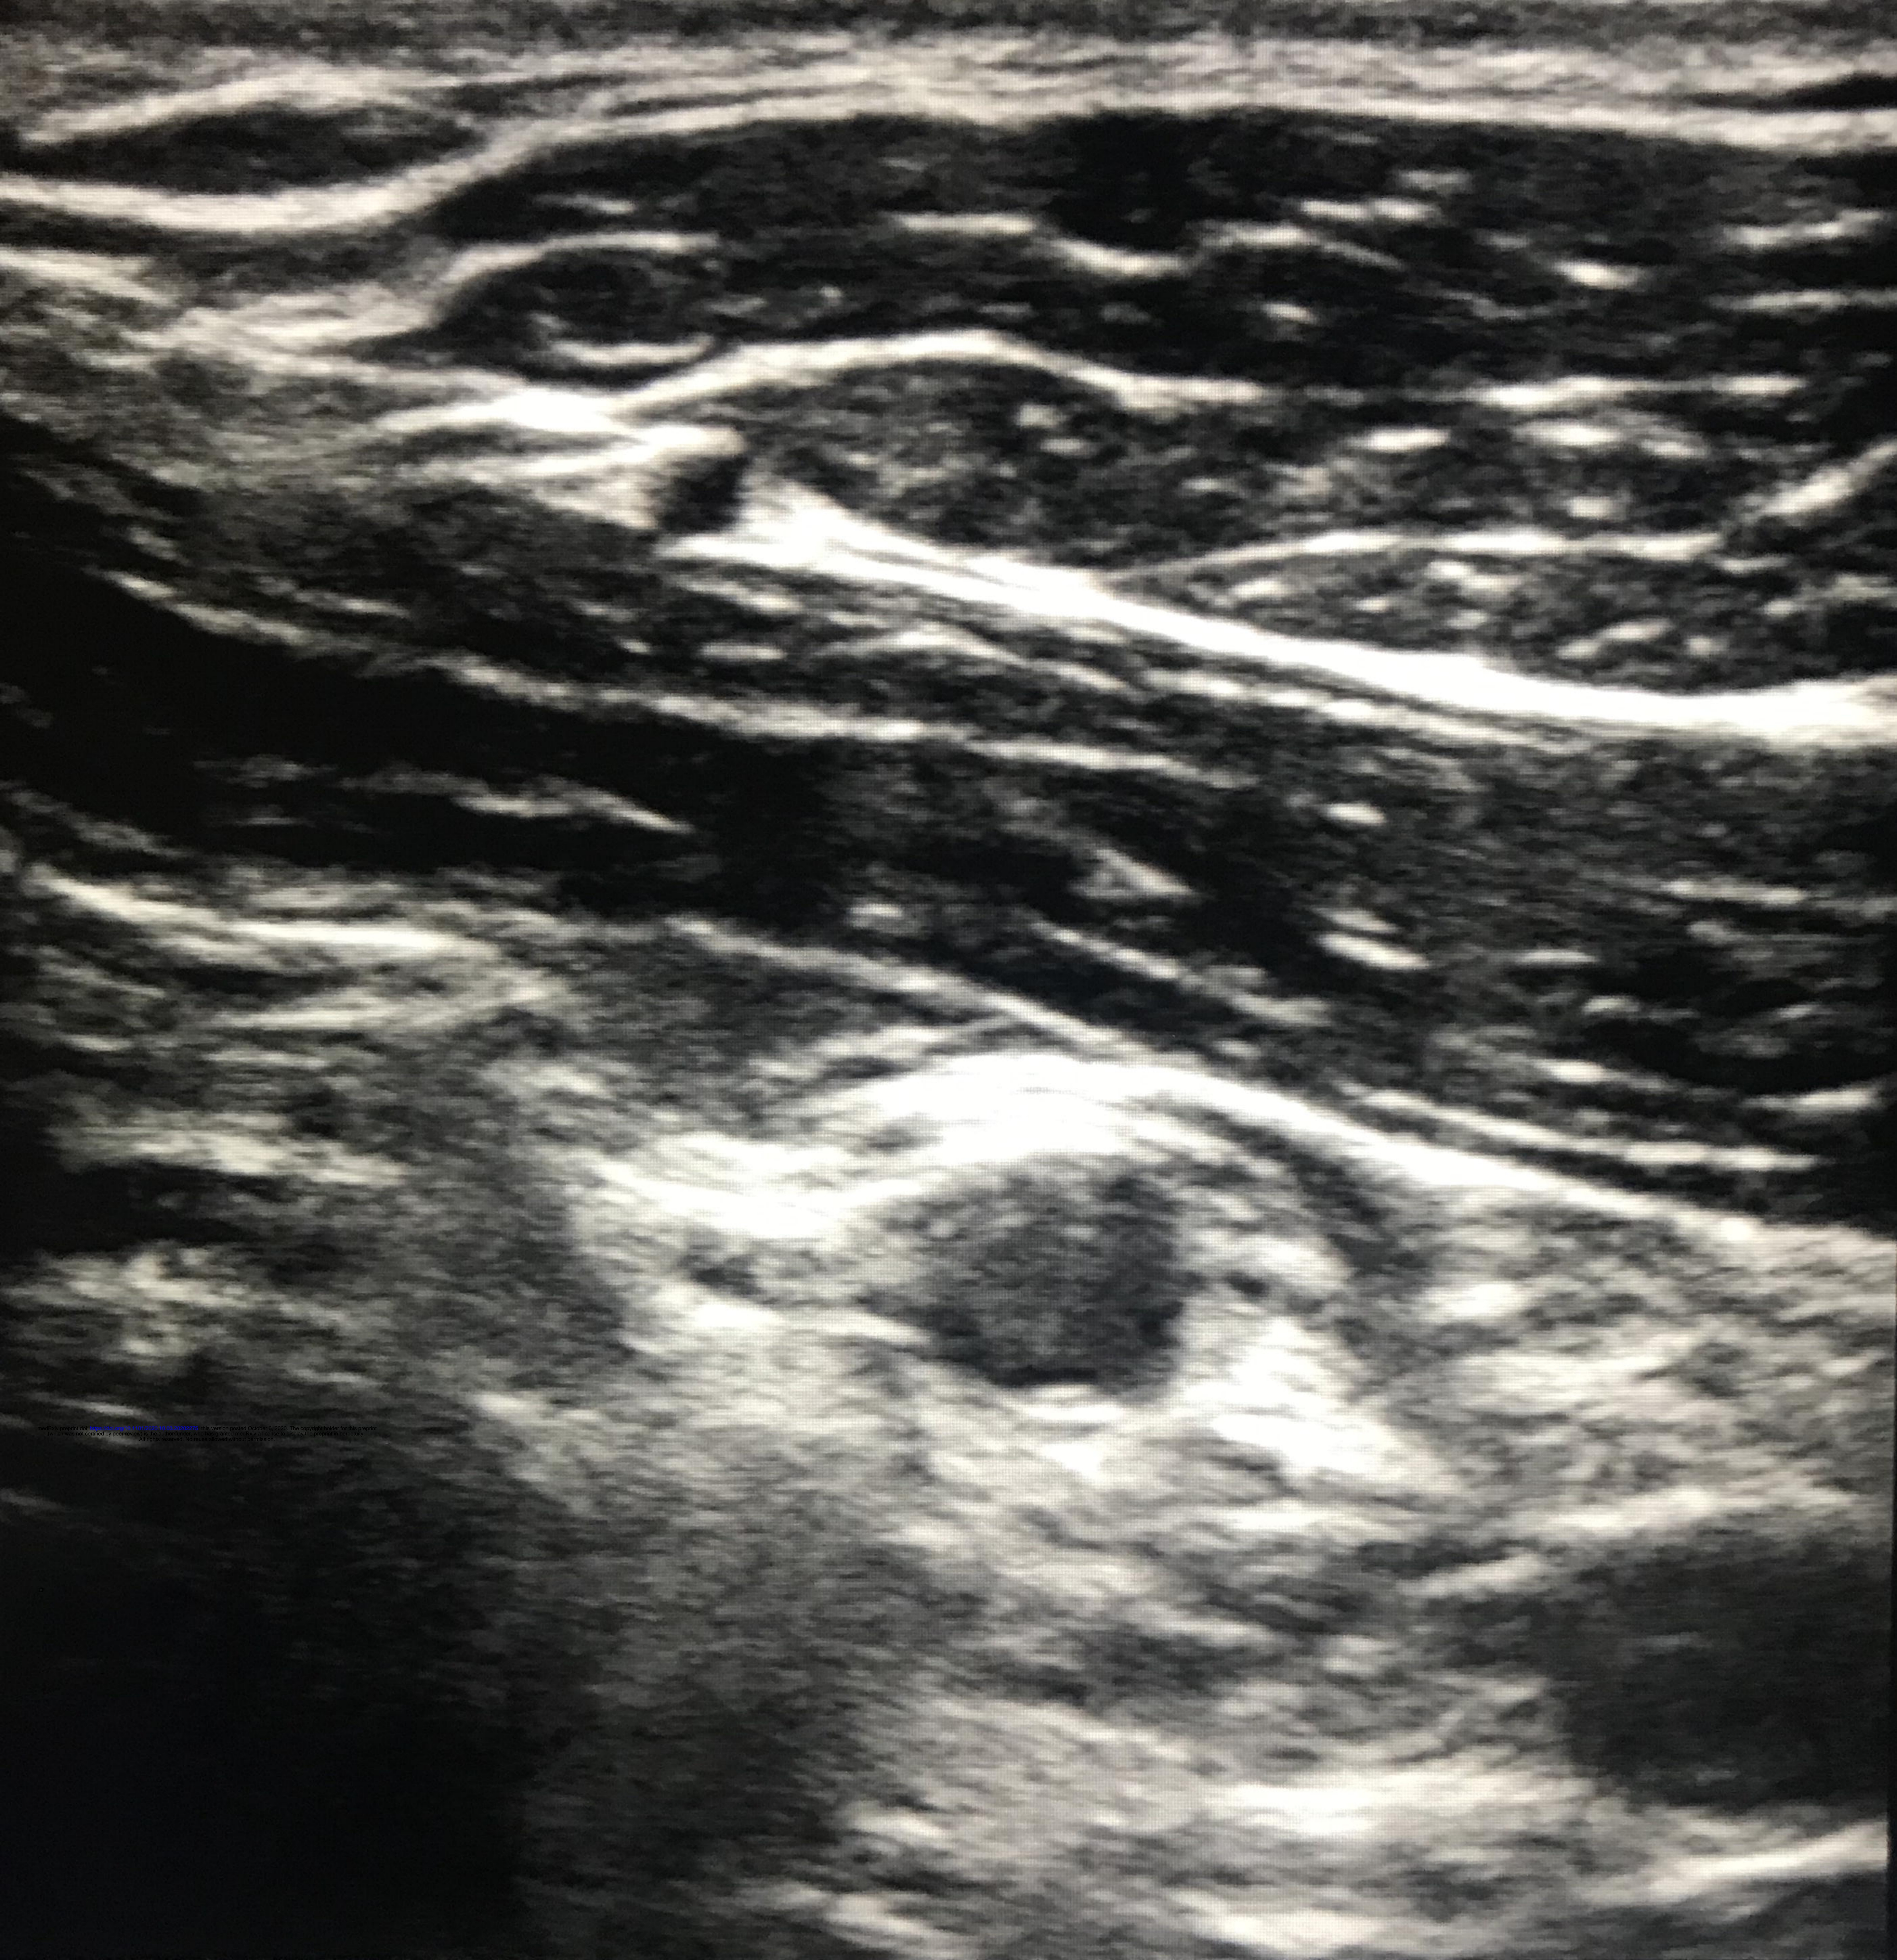

medRxiv preprint doi: <https://doi.org/10.1101/2020.10.03.20202275>; this version posted October 6, 2020. The copyright holder for this preprint (which was not certified by peer review) is the author/funder, who has granted medRxiv a license to display the preprint in perpetuity. All rights reserved. No reuse allowed without permission.

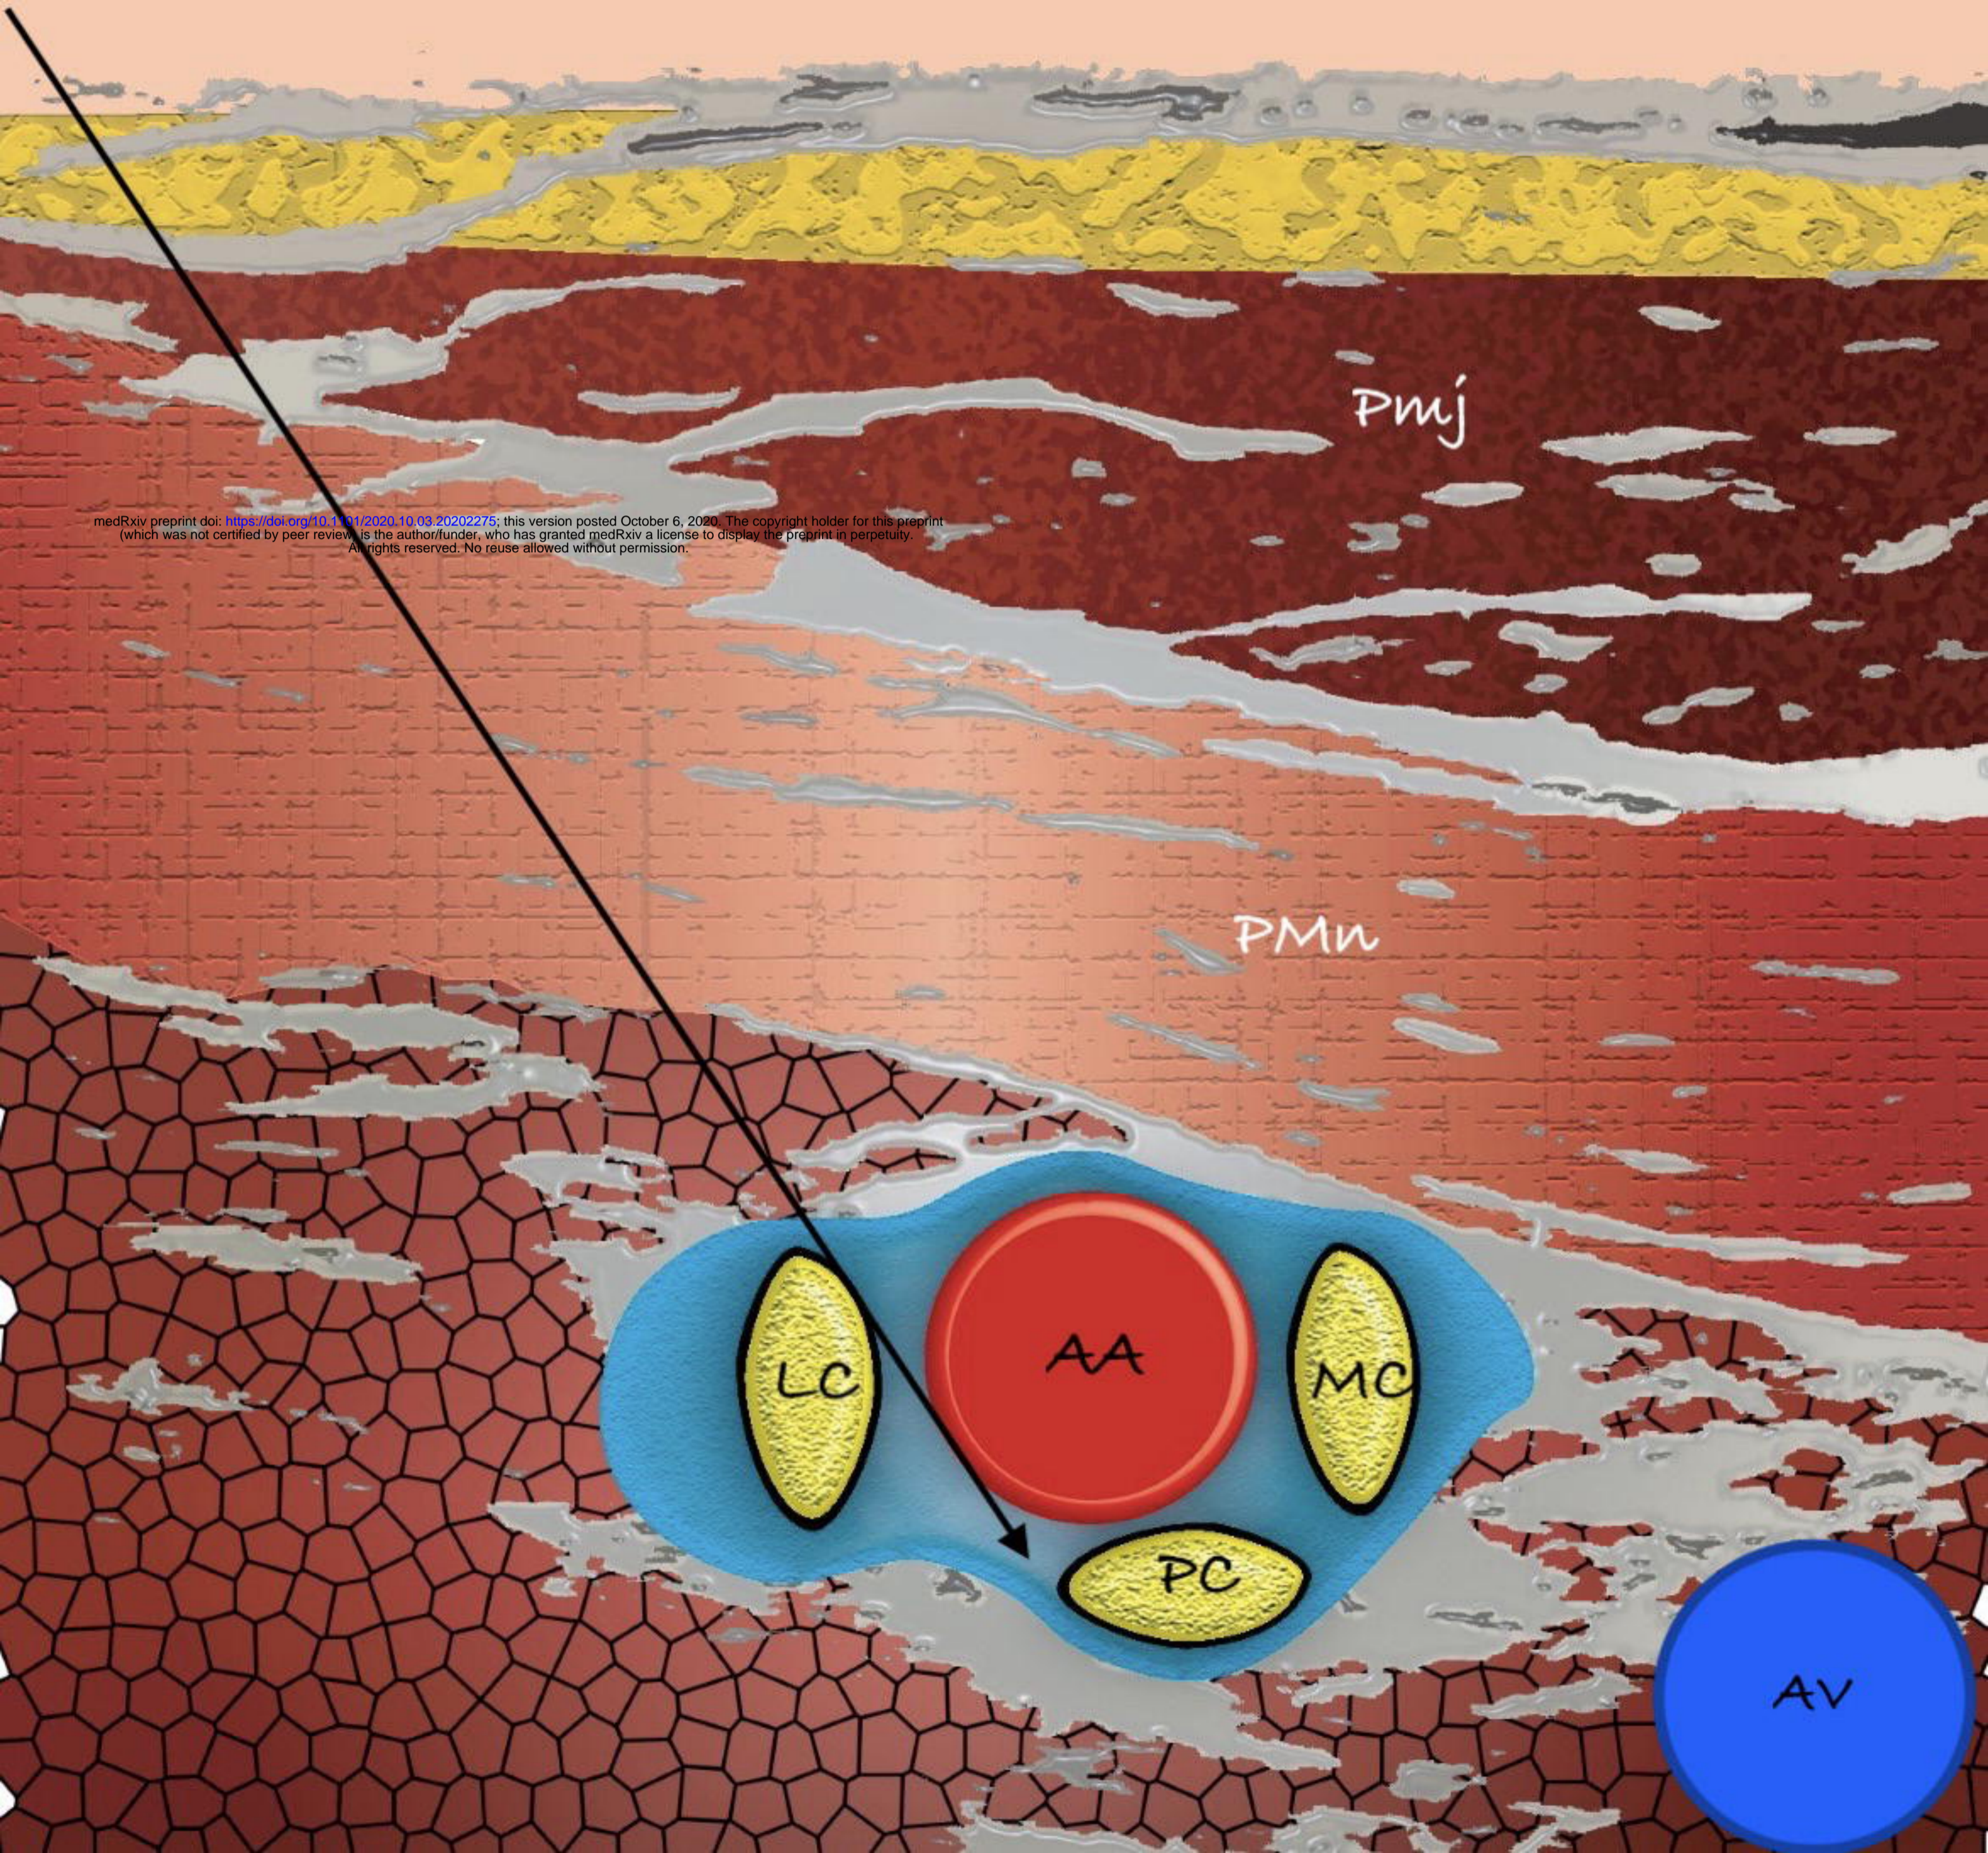

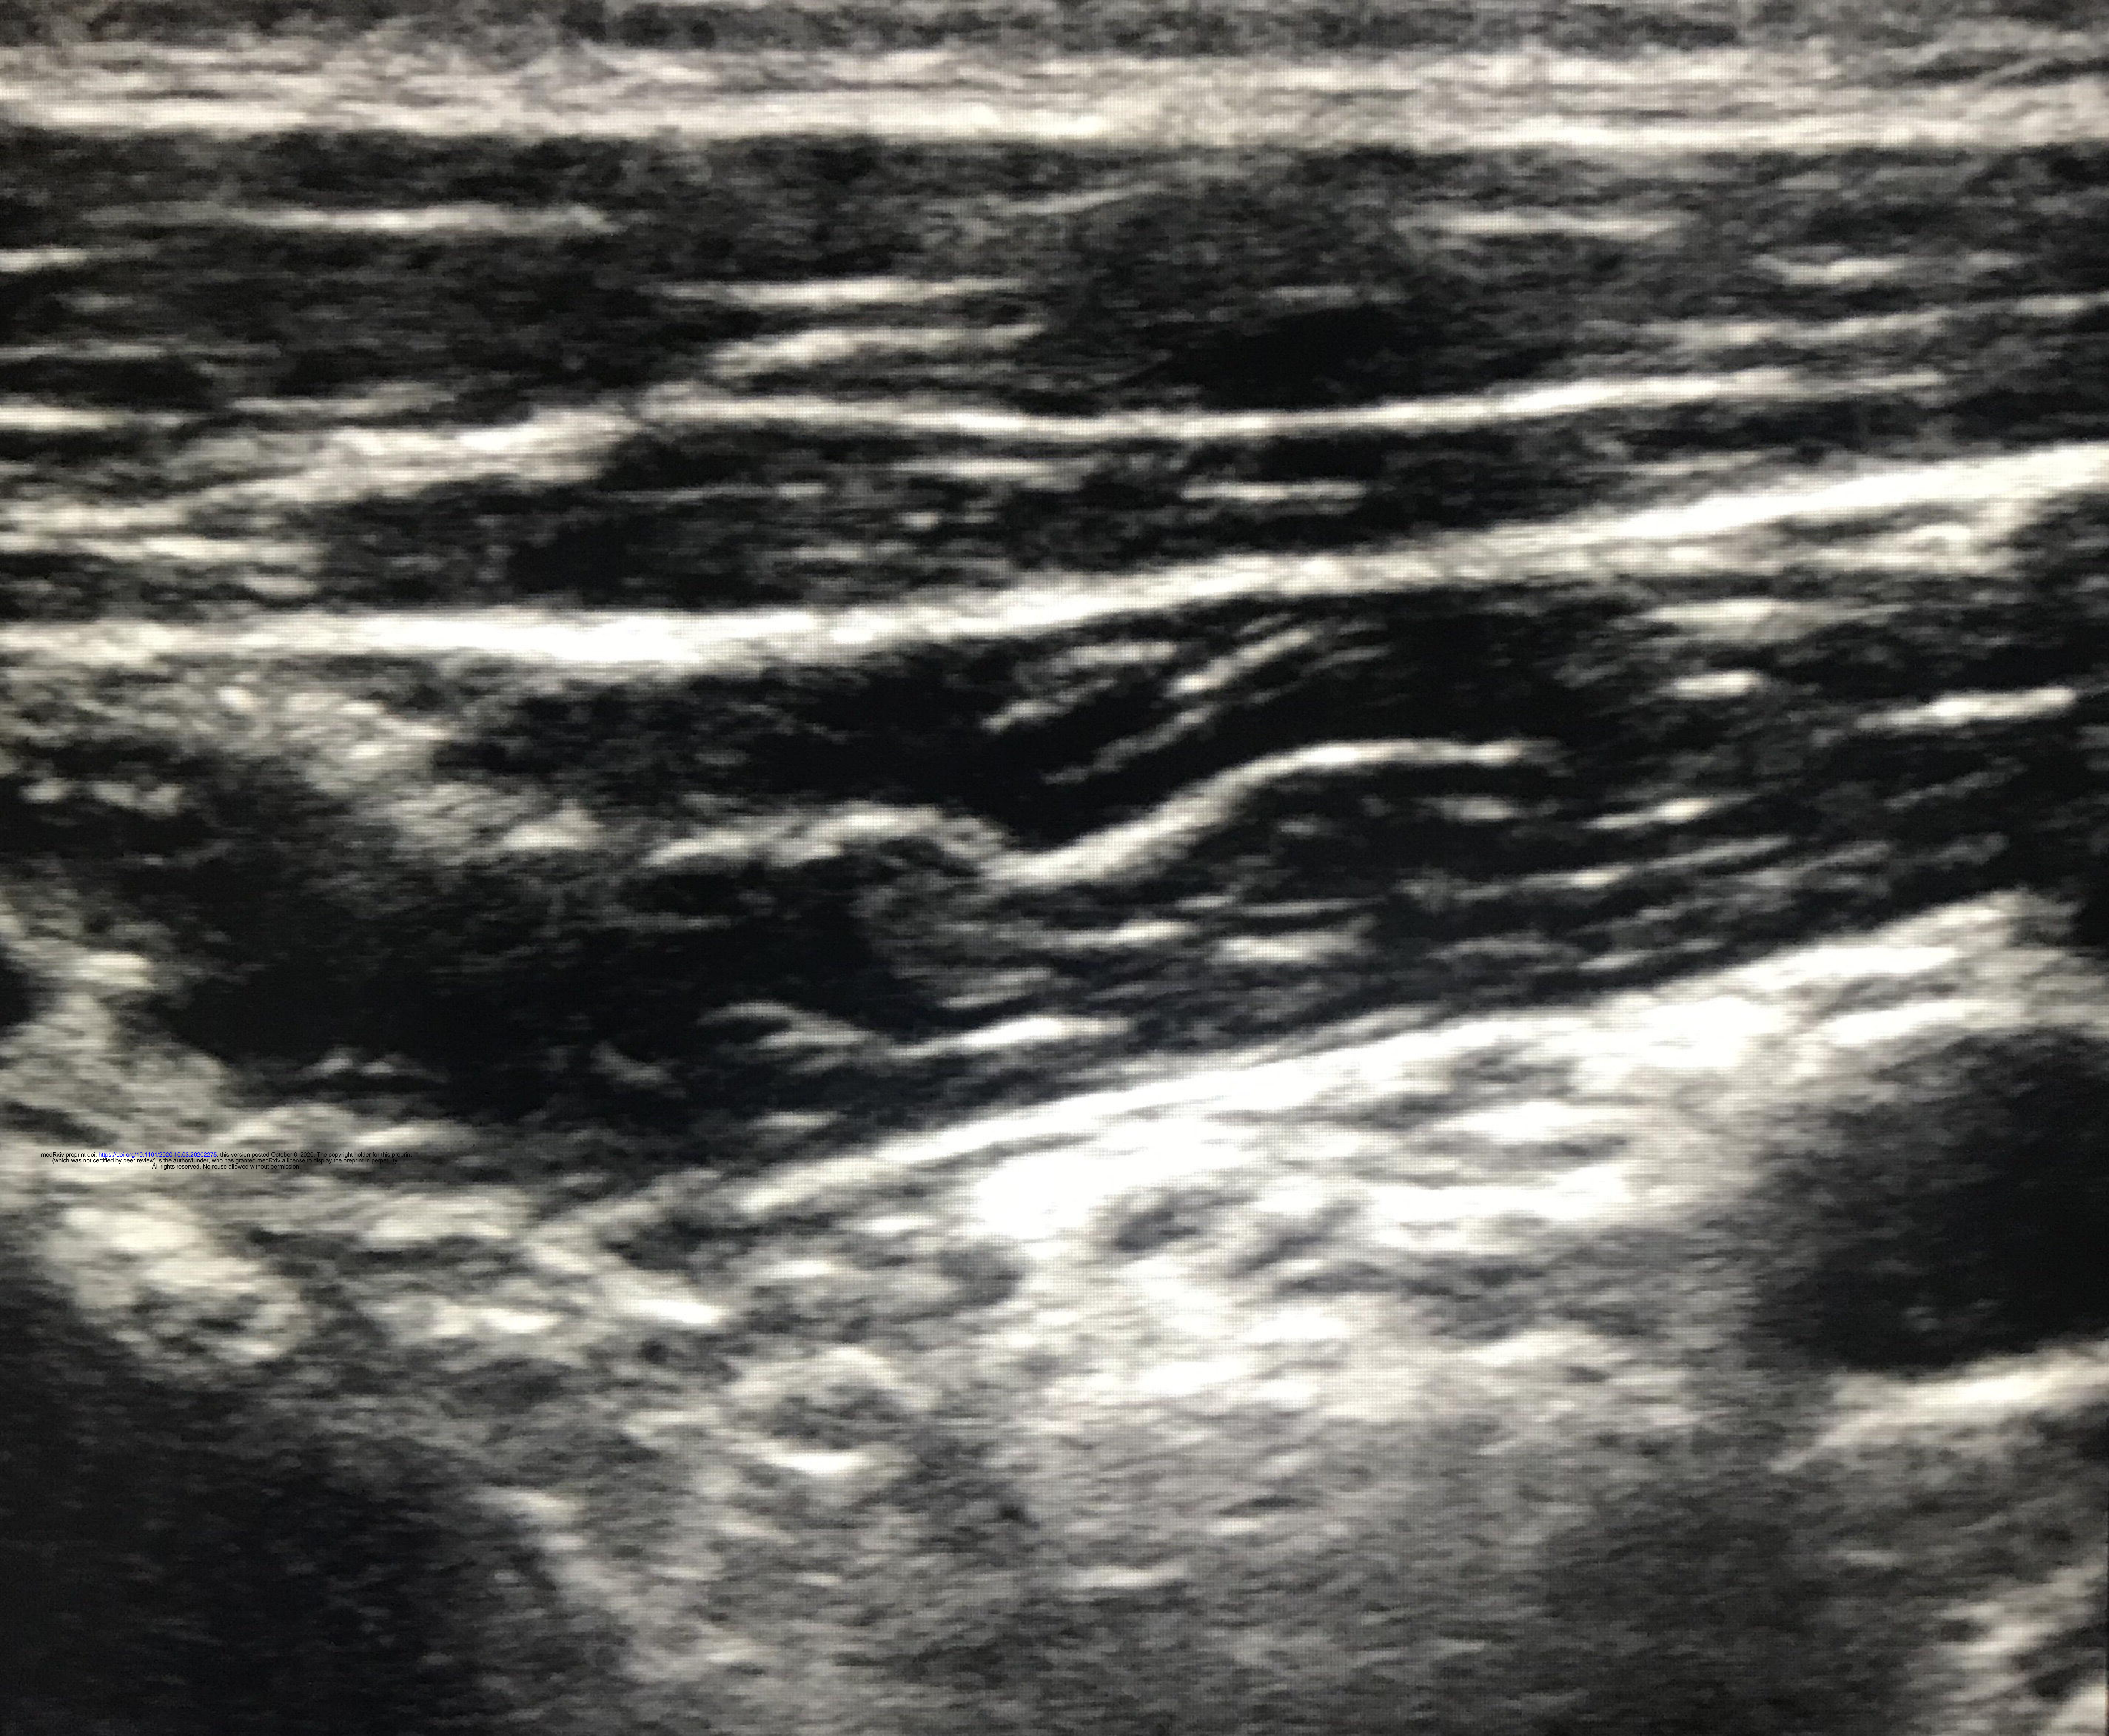

PMj: clavicular head

Subclavius

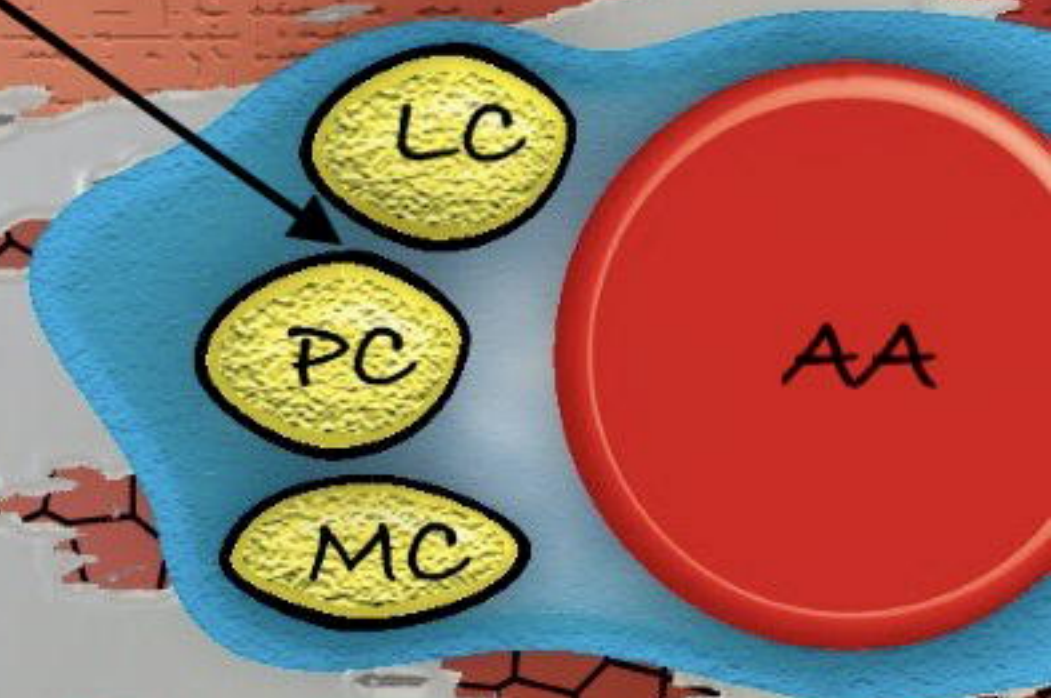

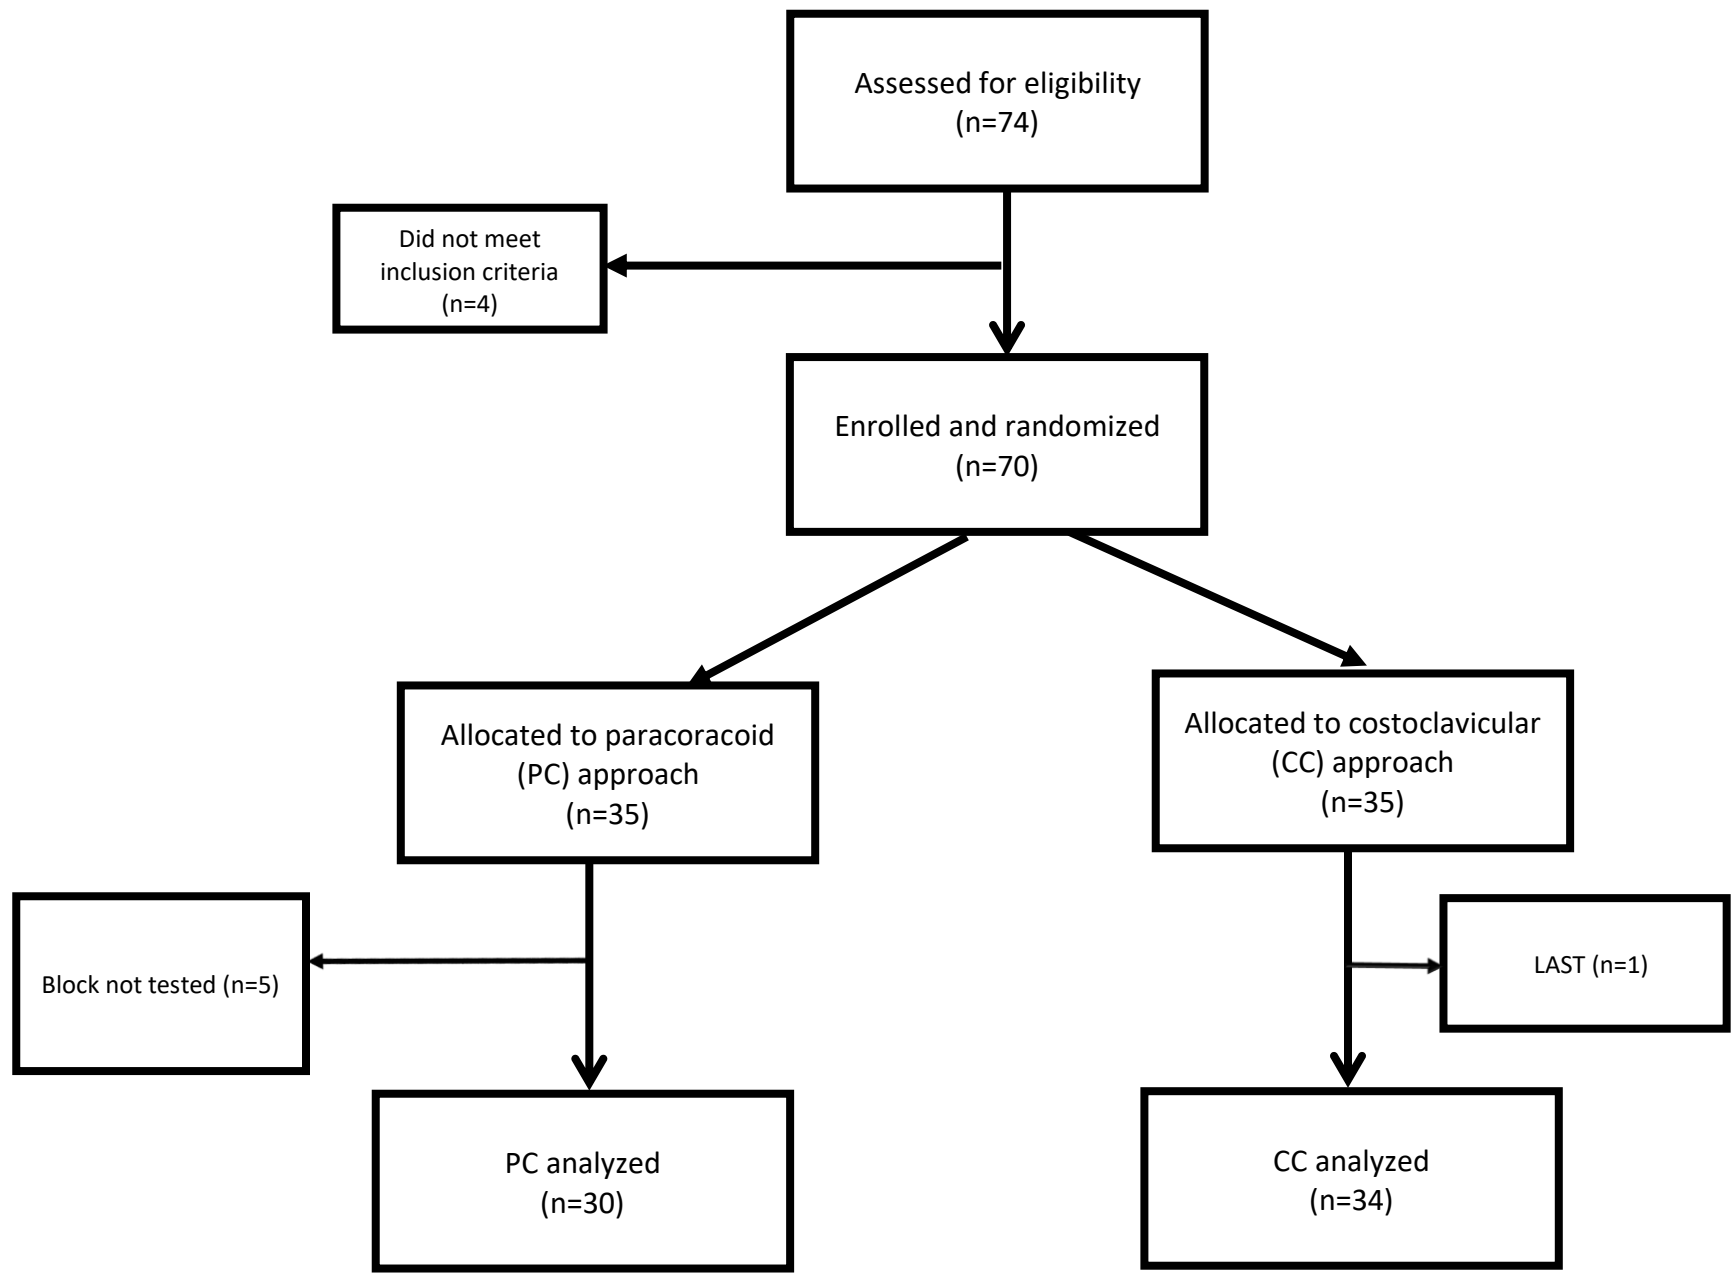

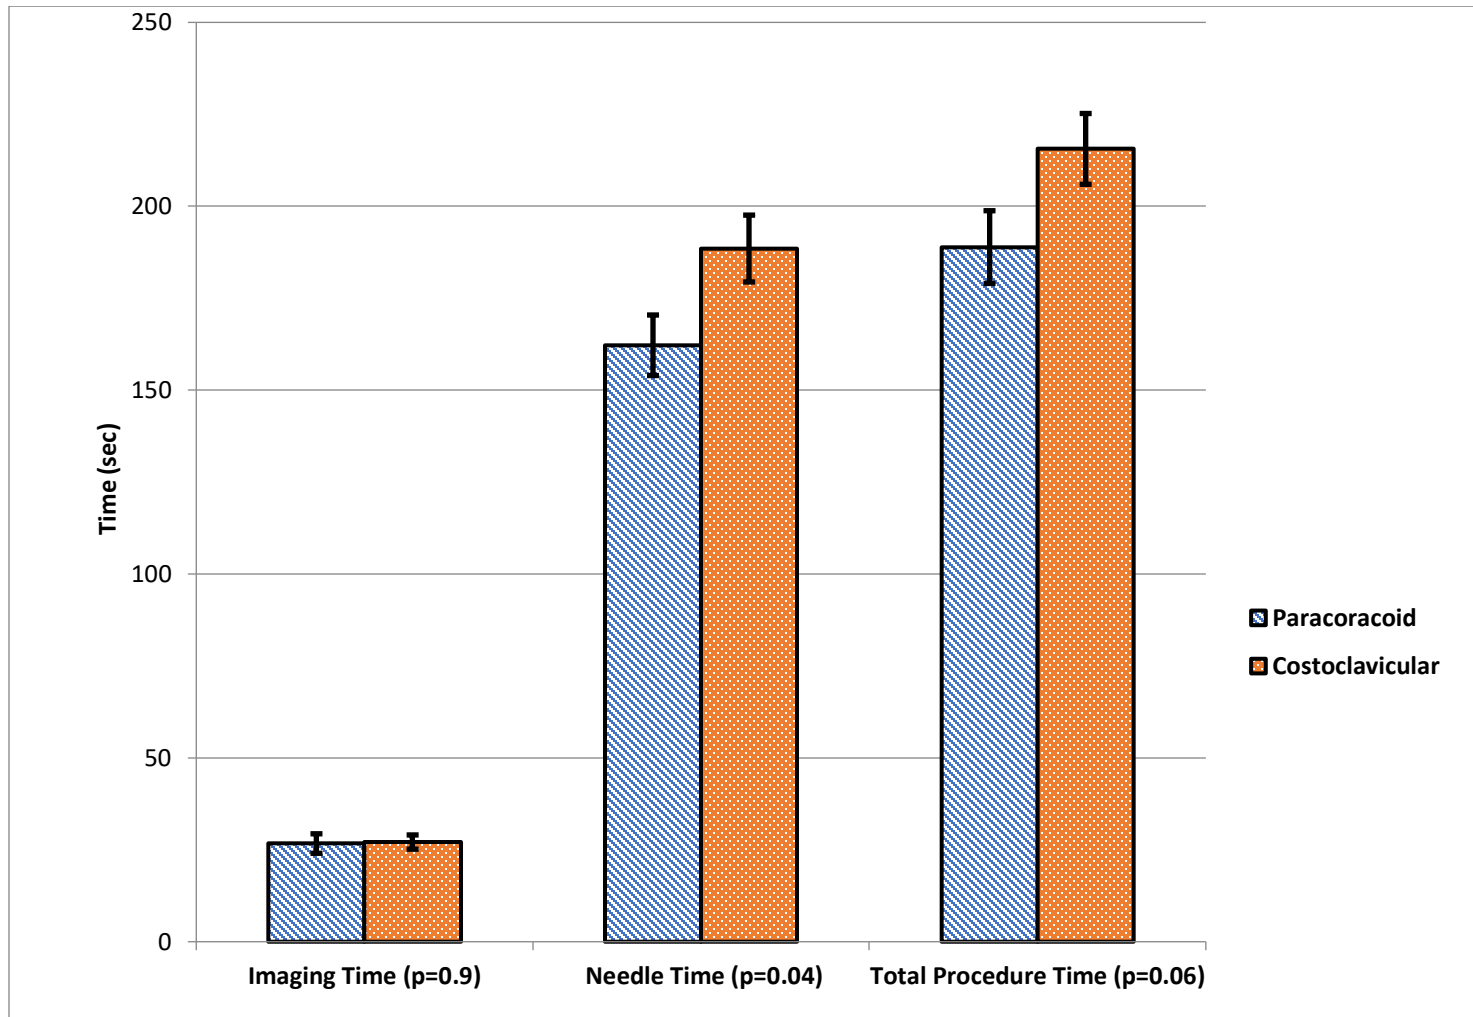

Figure 4: Procedure times. The boxes represent mean time in seconds and the whiskers show SEM.

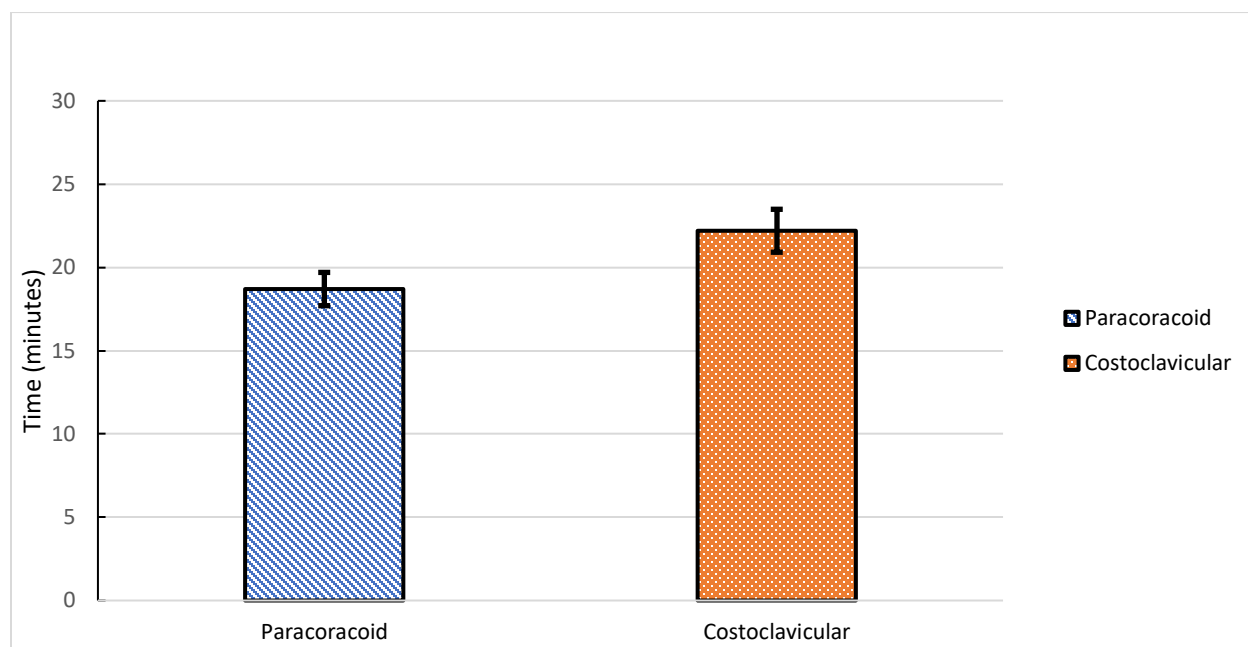

Figure 5: Primary outcome sensory block onset. The boxes represent mean time in minutes and the whiskers show SEM. The difference was significant ( $p=0.045$ ).



Figure 6: Percentage ready for surgery at various time points during the 30 minutes assessment period.

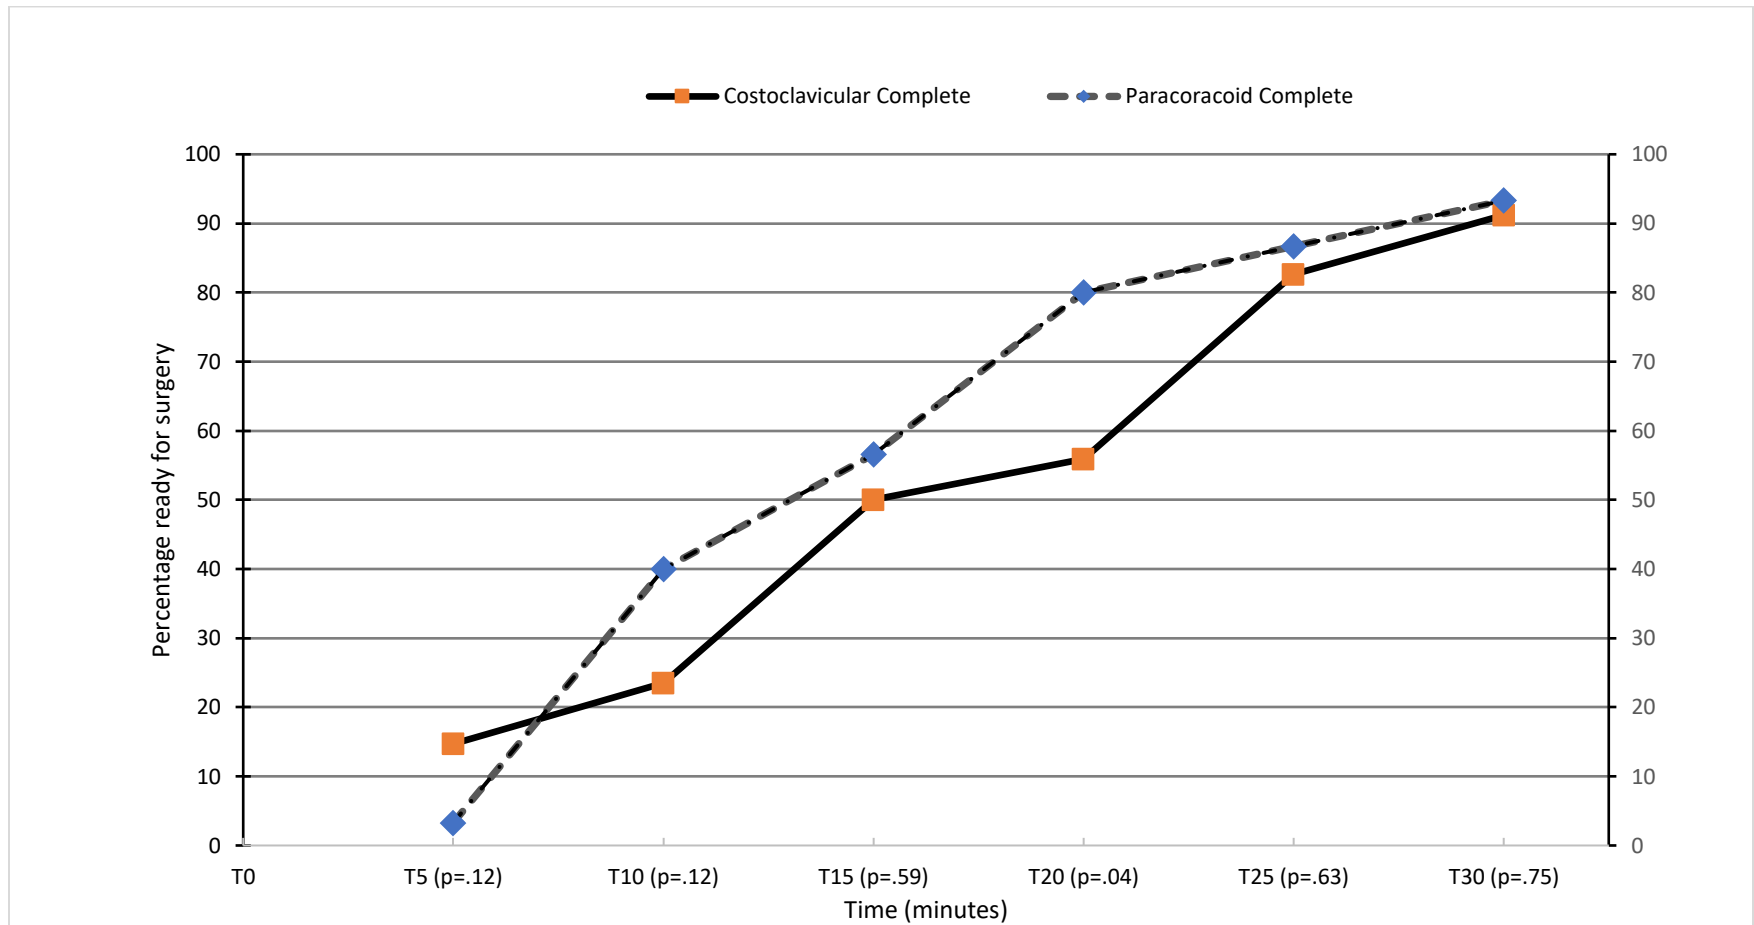

Source: https://medrxiv.org/content/10.1101/2020.10.03.20202275v1.full.pdf
